# Supplementary material for: Partitioning the forest water balance within a boreal catchment using sapflux, eddy covariance and process-based model
Source: Copernicus journal article supplement (doi:10.5194/hess-2019-541), 2019-10-24
Supplement: Supplementary file 1 [file hess-2019-541-supplement.pdf]

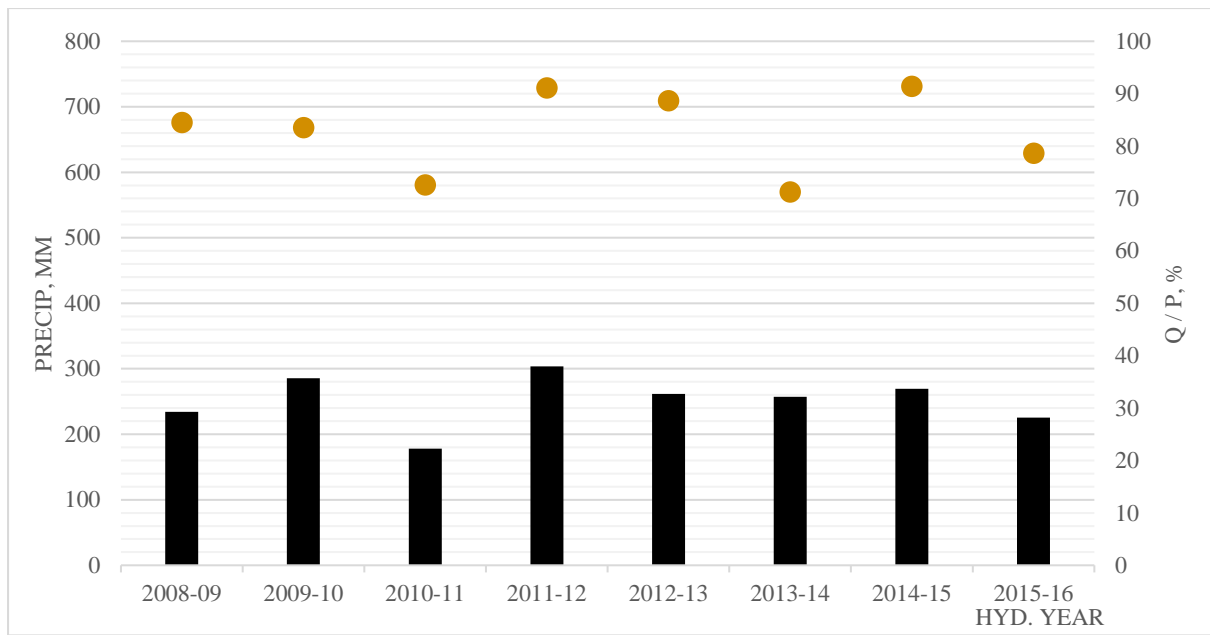

**Figure S1.** Annual precipitation (dots) and Q/P fraction (bars) over 8 hydrological years for the catchment C2.

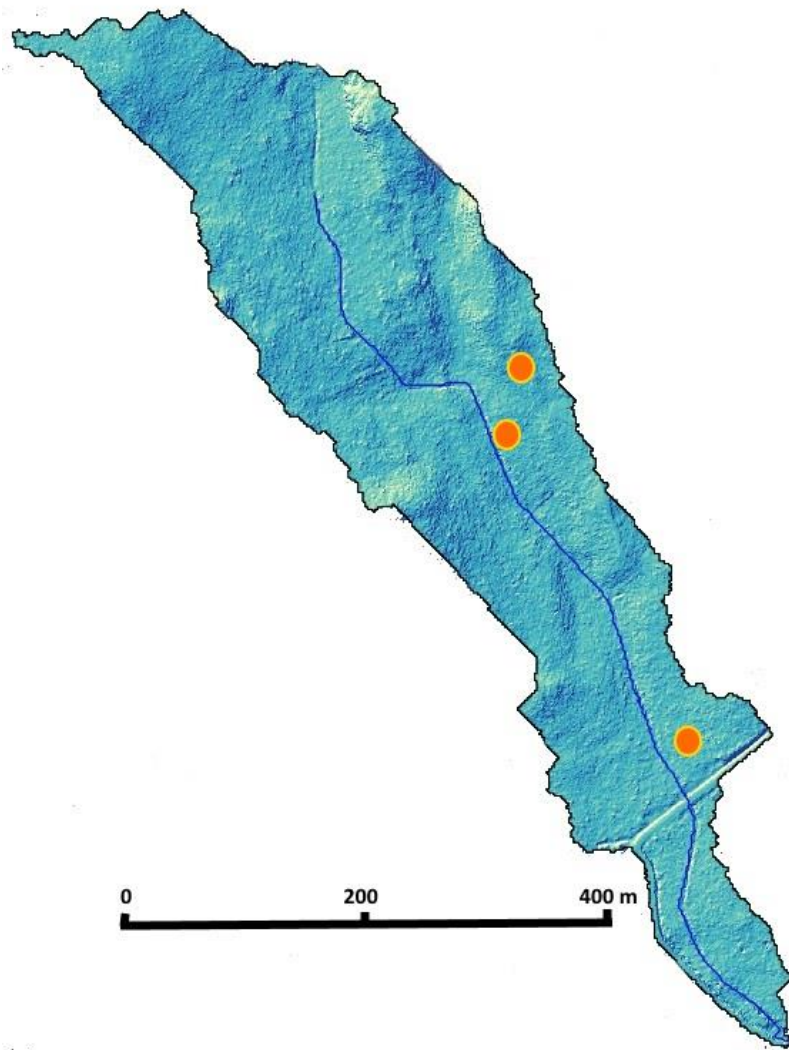

**Figure S2.** Locations of three nodes of the sap flow measurements within a subcatchment C2.

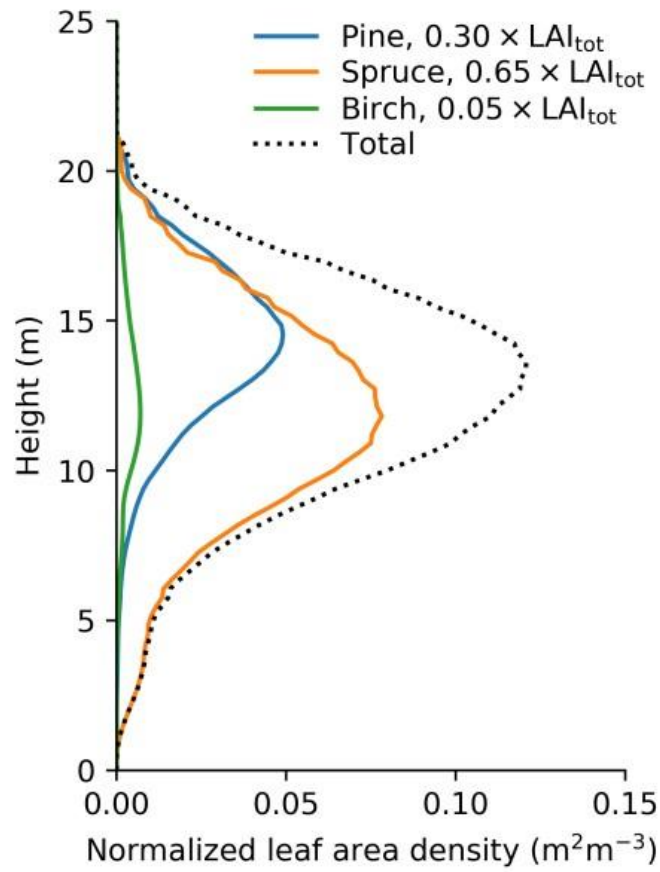

**Figure S3.** Normalized leaf area density distributions for main tree species and their fraction of total stand leaf area index ( $LAI_{tot}$ ) at subcatchment C2.

**Table S1.** Model parameter values applied in simulations (for plant type specific parameters see Table S2).

| Description                                                                                                              | Parameter value                     | Source                          |
|--------------------------------------------------------------------------------------------------------------------------|-------------------------------------|---------------------------------|
| <b>Canopy radiation parameters</b>                                                                                       |                                     |                                 |
| Clumping coefficient (-)                                                                                                 | 0.7                                 | (Campbell and Norman, 1998)     |
| Leaf-angle distribution (-)                                                                                              | 1.0 (spherical)                     | (Campbell and Norman, 1998)     |
| Shoot PAR albedo (-)                                                                                                     | 0.1                                 | Adjusted to match canopy albedo |
| Shoot NIR albedo (-)                                                                                                     | 0.39                                | Adjusted to match canopy albedo |
| Leaf emissivity (-)                                                                                                      | 0.98                                | (Campbell and Norman, 1998)     |
| <b>Canopy flow parameters</b>                                                                                            |                                     |                                 |
| Normalized horizontal pressure gradient ( $\text{m s}^{-2}$ )                                                            | 0.01                                |                                 |
| Foliage drag coefficient (-)                                                                                             | 0.15                                | (Lee et al., 1994)              |
| Schmidt number for $\text{H}_2\text{O}$ , T, $\text{CO}_2$                                                               | 2.0                                 |                                 |
| <b>Canopy interception parameters</b>                                                                                    |                                     |                                 |
| Maximum interception storage (mm)                                                                                        | $0.2\text{--}0.5 \times \text{LAI}$ | (Watanabe and Mizutani, 1996)   |
| Leaf orientation factor (-)                                                                                              | 0.5 (random)                        | (Watanabe and Mizutani, 1996)   |
| <b>Plant type parameters for photosynthesis–stomatal conductance model</b>                                               |                                     |                                 |
| Carboxylation capacity $V_{\text{cmax}}$ at $25^\circ\text{C}$ ( $\mu\text{mol m}^{-2} \text{s}^{-1}$ ) <sup>a</sup>     | $V_{\text{cmax}25}$                 | see Table 2                     |
| Electron transport capacity $J_{\text{max}}$ at $25^\circ\text{C}$ ( $\mu\text{mol m}^{-2} \text{s}^{-1}$ ) <sup>a</sup> | $1.97 \times V_{\text{cmax}25}$     | (Kattge and Knorr, 2007)        |
| Leaf dark respiration rate $r_d$ at $25^\circ\text{C}$ ( $\mu\text{mol m}^{-2} \text{s}^{-1}$ ) <sup>a</sup>             | $0.023 \times V_{\text{cmax}25}$    | (Launiainen et al., 2015)       |
| Co-limitation parameter                                                                                                  | 0.95                                |                                 |
| Curvature of electron transport light response (-)                                                                       | 0.7                                 | (Launiainen et al., 2015)       |
| Quantum yield parameter ( $\text{mol mol}^{-1}$ )                                                                        | 0.2                                 | (Launiainen et al., 2015)       |
| Stomatal model slope (-) <sup>b</sup>                                                                                    | $g_1$                               | see Table 2                     |
| Residual conductance ( $\text{mol m}^{-2} \text{s}^{-1}$ ) <sup>b</sup>                                                  | $g_0$                               | see Table 2                     |
| <b>Bryophyte layer parameters</b>                                                                                        |                                     |                                 |
| Height (m)                                                                                                               | 0.095                               | (Soudzilovskaia et al., 2013)   |
| Roughness height (m)                                                                                                     | 0.01                                | (Launiainen et al., 2015)       |
| Bulk density ( $\text{kg m}^{-3}$ )                                                                                      | 17.1                                | (Soudzilovskaia et al., 2013)   |
| Total pore volume ( $\text{m}^3 \text{m}^{-3}$ )                                                                         | 0.98                                | (Voortman et al., 2014)         |
| Maximum gravimetric water content, $w_{\text{max}}$ ( $\text{g g}^{-1}$ )                                                | 10                                  | (Soudzilovskaia et al., 2013)   |
| Minimum gravimetric water content ( $\text{g g}^{-1}$ )                                                                  | 1.5                                 | (Launiainen et al., 2015)       |
| Van Genuchten water retention parameter ( $\text{cm}^{-1}$ )                                                             | 0.13                                | (Voortman et al., 2014)         |
| Van Genuchten water retention parameter (-)                                                                              | 2.17                                | (Voortman et al., 2014)         |
| Saturated hydraulic conductivity (m/h)                                                                                   | $4.2 \times 10^{-4}$                | (Voortman et al., 2014)         |

|                                                              |       |                                                        |
|--------------------------------------------------------------|-------|--------------------------------------------------------|
| Pore connectivity (-)                                        | -2.37 | (Voortman et al., 2014)                                |
| Emissivity (-)                                               | 0.98  | (Campbell and Norman, 1998)                            |
| PAR albedo at $w_{\max}$ (-) <sup>c</sup>                    | 0.11  | (Bubier et al., 1997)                                  |
| NIR albedo at $w_{\max}$ (-) <sup>c</sup>                    | 0.29  | (Bubier et al., 1997)                                  |
| <b>Top soil layer parameters</b>                             |       |                                                        |
| Depth (m)                                                    | 0.1   | 2 × measurement depth of soil temperature and moisture |
| Porosity ( $\text{m}^3/\text{m}^3$ )                         | 0.8   | (Launiainen et al., 2015)                              |
| Residual water content ( $\text{m}^3/\text{m}^3$ )           | 0.01  | (Launiainen et al., 2015)                              |
| Van Genuchten water retention parameter ( $\text{cm}^{-1}$ ) | 0.7   | (Launiainen et al., 2015)                              |
| Van Genuchten water retention parameter (-)                  | 1.25  | (Launiainen et al., 2015)                              |
| Saturated hydraulic conductivity (m/h)                       | 0.015 | (Launiainen et al., 2015)                              |
| Thermal conductivity of solids (W/m/K)                       | 2.17  | Derived from soil composition <sup>d</sup>             |
| Heat capacity of solids ( $\text{MJ}/\text{m}^3/\text{K}$ )  | 2.35  | Derived from soil composition <sup>d</sup>             |

<sup>a</sup> Temperature response curves of  $V_{\text{cmax}}$  and  $J_{\text{max}}$  are adopted from Kattge and Knorr (2007) and of  $r_d$  from Launiainen et al. (2015)

<sup>b</sup> Parameters of Medlyn et al. (2011) optimal stomatal conductance model

<sup>c</sup> Response of albedo to bryophyte water content (Kieloaho and Launianen, 2018)

<sup>d</sup> Soil composition of top soil layer adopted from Jauhainen (2004) and thermal properties soil materials from Tian et al. (2016) and Campbell and Norman (1998)

**Table S2.** Plant type specific model parameter values applied in simulations.

| Description                                                      | Parameter value                |                                |                                |                         |
|------------------------------------------------------------------|--------------------------------|--------------------------------|--------------------------------|-------------------------|
|                                                                  | <b>Spruce</b>                  | <b>Pine</b>                    | <b>Birch</b>                   | <b>Understory</b>       |
| Maximum LAI, $LAI_{\max}$ ( $m^2/m^2$ ) <sup>a</sup>             | $0.31 \times LAI_{\text{tot}}$ | $0.64 \times LAI_{\text{tot}}$ | $0.05 \times LAI_{\text{tot}}$ | 0.4–0.8                 |
| Minimum LAI ( $m^2/m^2$ ) <sup>a</sup>                           | $0.8 \times LAI_{\max}$        | $0.8 \times LAI_{\max}$        | $0.1 \times LAI_{\max}$        | $0.5 \times LAI_{\max}$ |
| Minimum value for seasonal cycle modifier (-) <sup>b</sup>       | 0.1                            | 0.1                            | 0.01                           | 0.01                    |
| Characteristic leaf length scale (m)                             | 0.02                           | 0.02                           | 0.05                           | 0.05                    |
| Nitrogen attenuation coefficient (-)                             | 0.5                            | 0.5                            | 0.2                            | 0                       |
| $V_{\text{cmax}25}$ ( $\mu\text{mol m}^{-2} \text{s}^{-1}$ )     | 60                             | 50                             | 45                             | 40                      |
| Stomatal model slope $g_1$ (-)                                   | 2.5                            | 2.5                            | 4.5                            | 4.5                     |
| Residual conductance $g_0$ ( $\text{mol m}^{-2} \text{s}^{-1}$ ) | 0.004                          | 0.004                          | 0.01                           | 0.01                    |

<sup>a</sup> Seasonal development of LAI starts when the degree day sum ( $T_{\text{base}} = 5^\circ\text{C}$ ) exceeds 45 days and reaches maturation at 250 days. Leaf senescence in autumn follows Launiainen et al. (2015).  $LAI_{\text{tot}} = 3.4\text{--}6.9 \text{ m}^2 \text{ m}^{-2}$ .

<sup>b</sup> Seasonal cycle modifier for photosynthetic capacity is based on the delayed effect of temperature (Kolari et al., 2007; Launiainen et al., 2015).

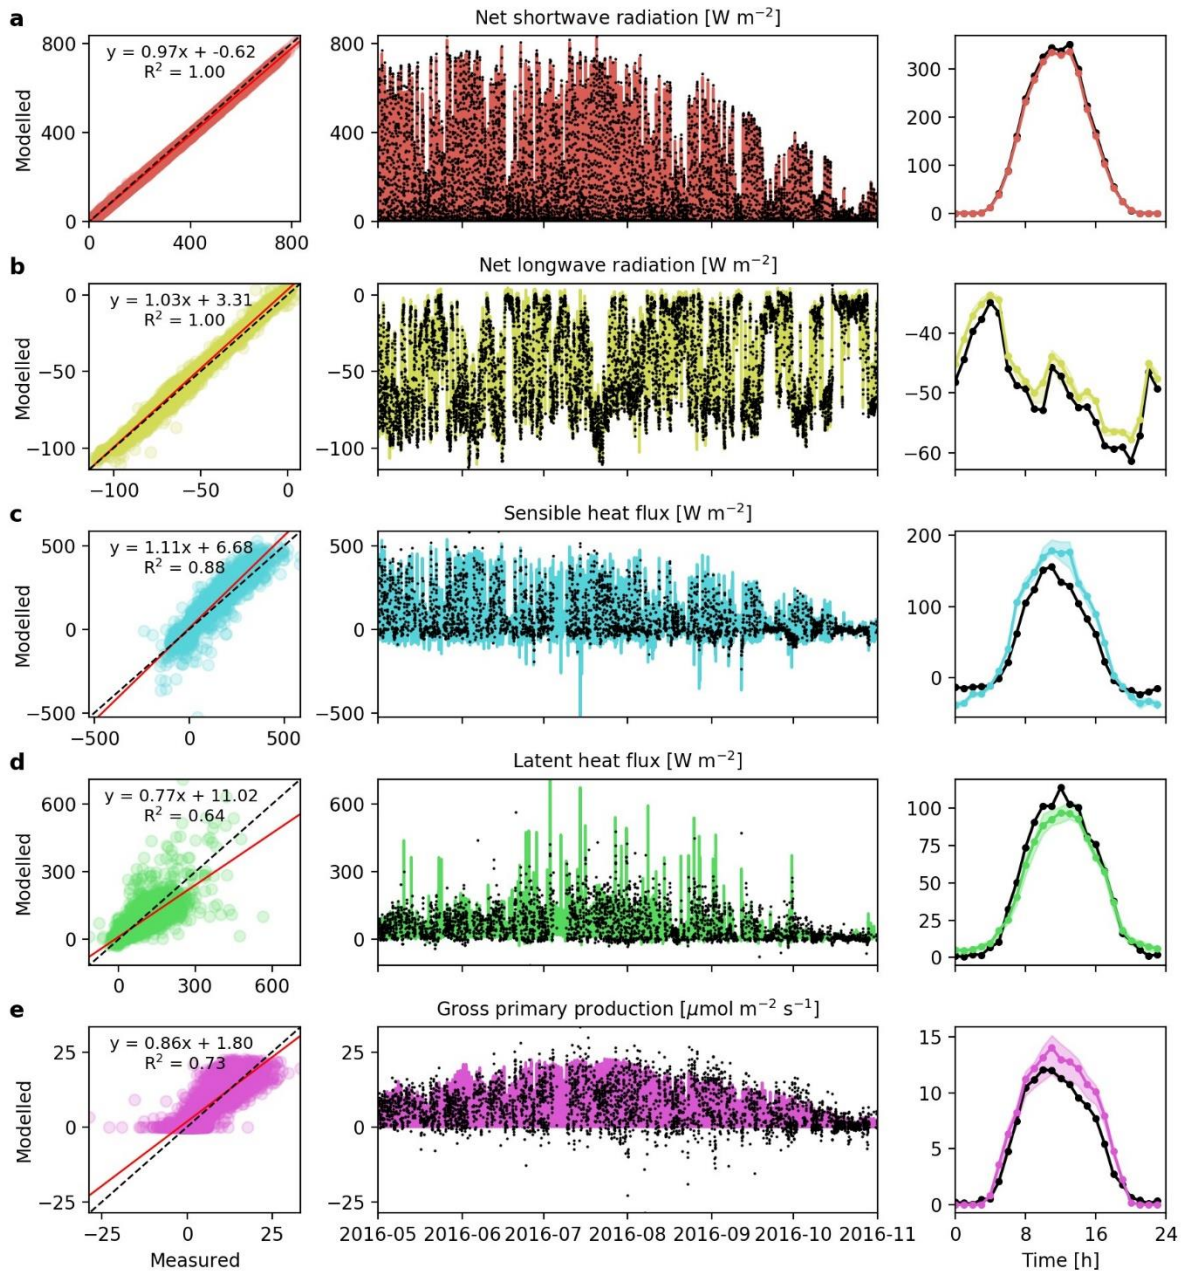

**Figure S4.** Scatter plot comparison, time series and average diurnal cycle for measured and modelled components of net radiation (a-b), sensible heat flux (c), latent heat flux (d), and gross primary production (e). Eddy covariance data (c-e) is non-gapfilled and only model results of times with data available are plotted in diurnal cycles. Modeled data are in colors and measured in black.

## References

- Bubier, J.L., Rock, B.N., Crill, P.M., 1997. Spectral reflectance measurements of boreal wetland and forest mosses. *Journal of Geophysical Research: Atmospheres* 102, 29483–29494. <https://doi.org/10.1029/97JD02316>
- Campbell, G.S., Norman, J.M., 1998. *Introduction to Environmental Biophysics*, 2nd ed. Springer.
- Jauhiainen, M., 2004. Relationships of particle size distribution curve, soil water retention curve and unsaturated hydraulic conductivity and their implications on water balance of forested and agricultural hillslopes. Helsinki University of Technology.
- Kattge, J., Knorr, W., 2007. Temperature acclimation in a biochemical model of photosynthesis: a reanalysis of data from 36 species. *Plant Cell Environ.* 30, 1176–1190. <https://doi.org/10.1111/j.1365-3040.2007.01690.x>
- Kieloaho, A.-J., Launianen, S., 2018. Effects of functional traits of bryophyte layer on water cycling and energy balance in boreal and arctic ecosystems, in: *EGU General Assembly Conference Abstracts*. p. 11786.
- Kolari, P., Lappalainen, H.K., Hänninen, H., Hari, P., 2007. Relationship between temperature and the seasonal course of photosynthesis in Scots pine at northern timberline and in southern boreal zone. *Tellus Series B-Chemical and Physical Meteorology* 59, 542–552.
- Launianen, S., Katul, G.G., Lauren, A., Kolari, P., 2015. Coupling boreal forest CO<sub>2</sub>, H<sub>2</sub>O and energy flows by a vertically structured forest canopy – Soil model with separate bryophyte layer. *Ecological Modelling* 312, 385–405. <https://doi.org/10.1016/j.ecolmodel.2015.06.007>
- Lee, X., Shaw, R.H., Black, T.A., 1994. Modelling the effect of mean pressure gradient on the mean flow within forests. *Agricultural and Forest Meteorology* 68, 201–212. [https://doi.org/10.1016/0168-1923\(94\)90036-1](https://doi.org/10.1016/0168-1923(94)90036-1)
- Medlyn, B.E., Duursma, R.A., Eamus, D., Ellsworth, D.S., Prentice, I.C., Barton, C.V.M., Crous, K.Y., Angelis, P.D., Freeman, M., Wingate, L., 2011. Reconciling the optimal and empirical approaches to modelling stomatal conductance. *Global Change Biology* 17, 2134–2144. <https://doi.org/10.1111/j.1365-2486.2010.02375.x>
- Soudzilovskaia, N.A., van Bodegom, P.M., Cornelissen, J.H., 2013. Dominant bryophyte control over high-latitude soil temperature fluctuations predicted by heat transfer traits, field moisture regime and laws of thermal insulation. *Functional Ecology* 27, 1442–1454.



Stenberg, P., 1996. Correcting LAI-2000 estimates for the clumping of needles in shoots of conifers. *Agricultural and Forest Meteorology* 79, 1–8. [https://doi.org/10.1016/0168-1923\(95\)02274-0](https://doi.org/10.1016/0168-1923(95)02274-0)

Tian, Z., Lu, Y., Horton, R., Ren, T., 2016. A simplified de Vries-based model to estimate thermal conductivity of unfrozen and frozen soil. *European Journal of Soil Science* 67, 564–572. <https://doi.org/10.1111/ejss.12366>

Voortman, B.R., Bartholomeus, R.P., Bodegom, P.M. van, Gooren, H., Zee, S.E.A.T.M. van der, Witte, J.-P.M., 2014. Unsaturated hydraulic properties of xerophilous mosses: towards implementation of moss covered soils in hydrological models. *Hydrological Processes* 28, 6251–6264. <https://doi.org/10.1002/hyp.10111>

Watanabe, T., Mizutani, K., 1996. Model study on micrometeorological aspects of rainfall interception over an evergreen broad-leaved forest. *Agricultural and Forest Meteorology* 80, 195–214. [https://doi.org/10.1016/0168-1923\(95\)02301-1](https://doi.org/10.1016/0168-1923(95)02301-1)
